# Supplementary material for: Association of Socioeconomic Position With Racial and Ethnic Disparities in Survival After Lung Transplant
Source: PubMed Central journal article supplement (PMC10116361; doi:10.1001/jamanetworkopen.2023.8306), 2023-04-19
Supplement: jamanetwopen-e238306-s001.pdf [file jamanetwopen-e238306-s001.pdf]

## Supplemental Online Content

Lehr CJ, Valapour M, Gunsalus PR, et al. Association of socioeconomic position with racial and ethnic disparities in survival after lung transplant. *JAMA Netw Open*. 2023;6(4):e238306. doi:10.1001/jamanetworkopen.2023.8306

**eAppendix.** Mediation Analysis Methods

**eTable 1.** Marginal Effects of Donor Race and Ethnicity Across ADI Quintile

**eTable 2.** Cox Proportional Hazards Model by Donor Factors

**eTable 3.** Marginal Effects of Recipient Race and Ethnicity Across ADI Quintile

**eFigure.** Ratios of Mortality Rates by State

**eTable 4.** Standardized Mortality Ratios By State Across Bayesian Models

**eTable 5.** Donor and Recipient Characteristics by US Census Region

**eReferences.**

This supplemental material has been provided by the authors to give readers additional information about their work.

## eAppendix. Mediation Analysis Methods

Mediation analysis was used to build generalized linear models to quantify the natural direct and indirect (through ADI) effects of recipient race on post-transplant survival. Estimation of the natural indirect effect was reasonable given that the following four assumptions were met: first, there was no unmeasured confounding in the relationship between recipient race and the post-transplant survival outcome (X and Y, respectively, in the X-M-Y model). Second, there was no unmeasured confounding of the relationship between neighborhood socioeconomic position (M) and the post-transplant survival outcome (Y) and nor was there, third, unmeasured confounding between race (X) and neighborhood socioeconomic position (M). Lastly, there was no observed or unobserved confounding between neighborhood socioeconomic position (M) and the post-transplant survival outcome (Y) that is caused by race (X)<sup>1</sup>. The prior-described interaction models of race and ADI evaluate the alternative possibility that neighborhood socioeconomic position modifies the relationship between race and post-transplant survival. A directed acyclic graph is presented in the appendix.

### Directed Acyclic Graph Guiding Study Design

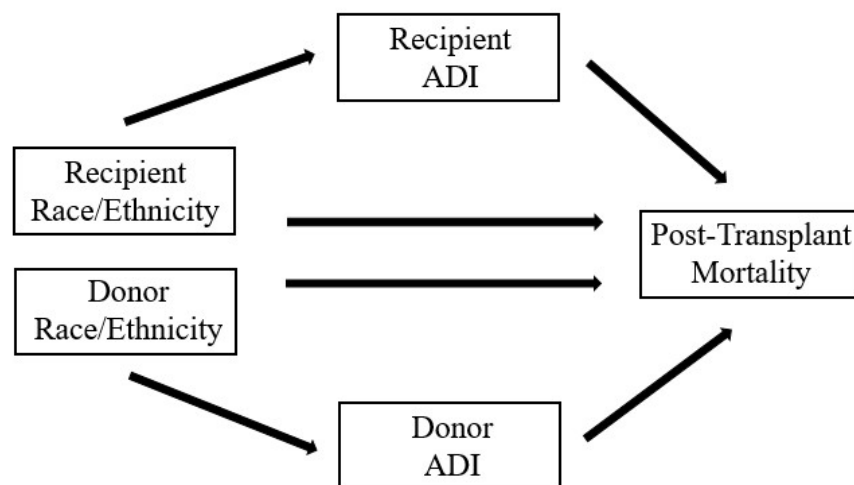

**eTable 1. Marginal Effects of Donor Race and Ethnicity Across ADI Quintile**

Tukey method for comparing a family of 5 estimates was used.

| <b>Comparison</b>            | <b>Donor ADI Quintile</b> | <b>Estimate</b> | <b>Z Ratio</b> | <b>p-value</b> |
|------------------------------|---------------------------|-----------------|----------------|----------------|
| NHW - Hispanic               | 1                         | 0.877           | -1.501         | 0.561          |
| NHW-NHB                      | 1                         | 0.740           | -3.529         | 0.003          |
| NHW - Asian/Pacific Islander | 1                         | 0.842           | -1.639         | 0.472          |
| NHW - Native American        | 1                         | 1.091           | 0.123          | 0.999          |
| NHW - Hispanic               | 2                         | 1.063           | 0.619          | 0.972          |
| NHW - NHB                    | 2                         | 0.868           | -1.614         | 0.488          |
| NHW - Asian/Pacific Islander | 2                         | 0.814           | -1.178         | 0.764          |
| NHW - Native American        | 2                         | 1.829           | 1.043          | 0.835          |
| NHW - Hispanic               | 3                         | 0.942           | -0.673         | 0.962          |
| NHW - NHB                    | 3                         | 0.907           | -1.220         | 0.740          |
| NHW - Asian/Pacific Islander | 3                         | 1.414           | 1.640          | 0.472          |
| NHW - Native American        | 3                         | 3.431           | 1.742          | 0.408          |
| NHW - Hispanic               | 4                         | 0.944           | -0.725         | 0.951          |
| NHW - NHB                    | 4                         | 0.771           | -3.842         | 0.001          |
| NHW - Asian/Pacific Islander | 4                         | 0.853           | -0.840         | 0.918          |
| NHW - Native American        | 4                         | 0.382           | -3.925         | 0.001          |
| NHW - Hispanic               | 5                         | 0.942           | -0.920         | 0.889          |
| NHW - NHB                    | 5                         | 0.829           | -3.267         | 0.010          |
| NHW - Asian/Pacific Islander | 5                         | 0.723           | -1.981         | 0.275          |
| NHW - Native American        | 5                         | 0.883           | -0.425         | 0.993          |

**eTable 2. Cox Proportional Hazards Model by Donor Factors**

| <b>Characteristic</b>                                    | <b>HR (95% CI)<sup>1</sup></b> | <b>p-value</b> |
|----------------------------------------------------------|--------------------------------|----------------|
| <i>Donor Race</i>                                        |                                |                |
| <i>Non-Hispanic White</i>                                | —                              |                |
| <i>Hispanic</i>                                          | 1.06 (0.98, 1.14)              | 0.13           |
| <i>Non-Hispanic Black</i>                                | 1.22 (1.14, 1.30)              | <0.001         |
| <i>Asian/Pacific Islander</i>                            | 1.09 (0.95, 1.26)              | 0.2            |
| <i>Multi-Racial</i>                                      | 1.14 (0.66, 1.97)              | 0.6            |
| <i>Native American</i>                                   | 1.11 (0.80, 1.55)              | 0.5            |
| <i>Cause of Death</i>                                    |                                |                |
| <i>Anoxia</i>                                            | —                              |                |
| <i>CVA</i>                                               | 1.04 (0.97, 1.11)              | 0.2            |
| <i>Head Trauma</i>                                       | 0.96 (0.90, 1.02)              | 0.2            |
| <i>CNS Tumor</i>                                         | 0.82 (0.56, 1.20)              | 0.3            |
| <i>Other</i>                                             | 1 (0.85, 1.18)                 | >0.9           |
| <i>Blood Type</i>                                        |                                |                |
| <i>A</i>                                                 | —                              |                |
| <i>AB</i>                                                | 1.03 (0.87, 1.21)              | 0.8            |
| <i>B</i>                                                 | 0.96 (0.88, 1.04)              | 0.3            |
| <i>O</i>                                                 | 1.02 (0.97, 1.08)              | 0.4            |
| <i>HLA Mismatches</i>                                    |                                |                |
| <i>0</i>                                                 | —                              |                |
| <i>1</i>                                                 | 0.98 (0.38, 2.51)              | >0.9           |
| <i>2</i>                                                 | 1.2 (0.49, 2.91)               | 0.7            |
| <i>3</i>                                                 | 1.2 (0.50, 2.89)               | 0.7            |
| <i>4</i>                                                 | 1.13 (0.47, 2.72)              | 0.8            |
| <i>5</i>                                                 | 1.23 (0.51, 2.96)              | 0.6            |
| <i>6</i>                                                 | 1.34 (0.55, 3.21)              | 0.5            |
| <sup>1</sup> HR = Hazard Ratio, CI = Confidence Interval |                                |                |

**eTable 3. Marginal Effects of Recipient Race and Ethnicity Across ADI Quintile**

Tukey method for comparing a family of 5 estimates was used.

| <b>Comparison</b>            | <b>Recipient ADI Quintile</b> | <b>Estimate</b> | <b>Z Ratio</b> | <b>p-value</b> |
|------------------------------|-------------------------------|-----------------|----------------|----------------|
| NHW - Hispanic               | 1                             | 1.169           | 1.539          | 0.639          |
| NHW - NHB                    | 1                             | 0.984           | -0.164         | 0.999          |
| NHW - Asian/Pacific Islander | 1                             | 1.137           | 1.038          | 0.905          |
| NHW - Multi-Racial           | 1                             | 1.385           | 0.651          | 0.987          |
| NHW - Native American        | 1                             | 1.097           | 0.161          | 0.999          |
| NHW - Hispanic               | 2                             | 1.118           | 0.914          | 0.943          |
| NHW - NHB                    | 2                             | 0.920           | -0.790         | 0.969          |
| NHW - Asian/Pacific Islander | 2                             | 1.236           | 0.984          | 0.923          |
| NHW - Multi-Racial           | 2                             | 0.620           | -0.675         | 0.985          |
| NHW - Native American        | 2                             | 0.737           | -0.529         | 0.995          |
| NHW - Hispanic               | 3                             | 1.121           | 0.955          | 0.932          |
| NHW - NHB                    | 3                             | 0.887           | -1.163         | 0.854          |
| NHW - Asian/Pacific Islander | 3                             | 1.401           | 0.949          | 0.933          |
| NHW - Multi-Racial           | 3                             | 0.857           | -0.267         | 0.999          |
| NHW - Native American        | 3                             | 2.193           | 0.785          | 0.970          |
| NHW - Hispanic               | 4                             | 1.034           | 0.299          | 0.999          |
| NHW - NHB                    | 4                             | 0.984           | -0.168         | 0.999          |
| NHW - Asian/Pacific Islander | 4                             | 0.976           | -0.086         | 0.999          |
| NHW - Multi-Racial           | 4                             | 0.755           | -0.398         | 0.999          |
| NHW - Native American        | 4                             | 1.117           | 0.192          | 0.999          |
| NHW - Hispanic               | 5                             | 0.916           | -0.965         | 0.929          |
| NHW - NHB                    | 5                             | 0.789           | -3.042         | 0.028          |
| NHW - Asian/Pacific Islander | 5                             | 0.626           | -1.604         | 0.596          |
| NHW - Multi-Racial           | 5                             | 0.696           | -0.806         | 0.967          |
| NHW - Native American        | 5                             | 0.897           | -0.305         | 0.999          |

### eFigure 1. Ratios of Mortality Rates by State

Ratios of mortality rates calculated by dividing the observed number of deaths per state by the corresponding model predicted per state using the Bayesian conditional autoregressive (CAR) Poisson rate model.

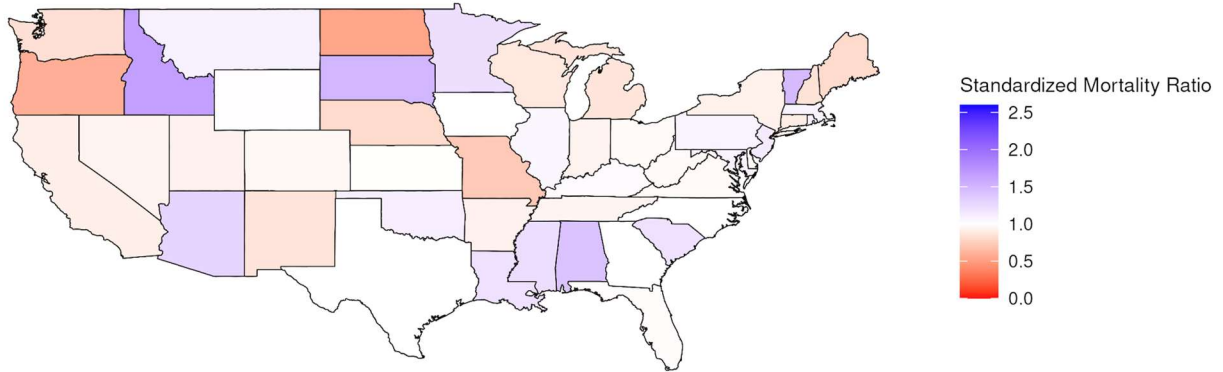

**eTable 4. Standardized Mortality Ratios By State Across Bayesian Models**

Model 1) Spatial autocorrelation alone, Model 2) Spatial autocorrelation with candidate and donor race, ADI, and US census region, Model 3) Spatial autocorrelation with candidate and donor race, ADI, excluding US census region, and Model 4) Spatial autocorrelation and region alone. Model 1 SMRs were mapped in Figure 4.

SMR, Standardized Mortality Ratio

| Recipient State | Total Deaths | Survival Time | Model 1 SMR | Model 2 SMR | Model 3 SMR | Model 4 SMR |
|-----------------|--------------|---------------|-------------|-------------|-------------|-------------|
| <i>AL</i>       | 101          | 215281        | 1.41        | 1.34        | 1.34        | 1.37        |
| <i>AR</i>       | 45           | 148845        | 0.93        | 0.87        | 0.90        | 0.90        |
| <i>AZ</i>       | 290          | 686208        | 1.30        | 1.33        | 1.32        | 1.32        |
| <i>CA</i>       | 617          | 2065799       | 0.91        | 0.94        | 0.92        | 0.94        |
| <i>CO</i>       | 95           | 302742        | 0.96        | 0.98        | 0.97        | 0.97        |
| <i>CT</i>       | 61           | 206059        | 0.90        | 0.87        | 0.88        | 0.89        |
| <i>DE</i>       | 39           | 123045        | 0.96        | 0.88        | 0.94        | 0.90        |
| <i>FL</i>       | 418          | 1242098       | 0.99        | 0.98        | 0.99        | 0.95        |
| <i>GA</i>       | 146          | 440631        | 1.00        | 0.97        | 0.97        | 0.98        |
| <i>IA</i>       | 31           | 93259         | 1.02        | 1.11        | 1.05        | 1.11        |
| <i>ID</i>       | 26           | 47612         | 1.65        | 1.70        | 1.73        | 1.60        |
| <i>IL</i>       | 288          | 838132        | 1.05        | 1.11        | 1.04        | 1.13        |
| <i>IN</i>       | 208          | 682013        | 0.94        | 1.01        | 0.96        | 1.01        |
| <i>KS</i>       | 53           | 159573        | 0.99        | 1.06        | 1.02        | 1.04        |
| <i>KY</i>       | 137          | 409779        | 1.02        | 1.00        | 1.02        | 1.01        |
| <i>LA</i>       | 133          | 335113        | 1.20        | 1.11        | 1.15        | 1.15        |
| <i>MA</i>       | 144          | 404171        | 1.08        | 1.05        | 1.10        | 1.03        |
| <i>MD</i>       | 181          | 507862        | 1.09        | 1.03        | 1.05        | 1.05        |
| <i>ME</i>       | 24           | 79448         | 0.81        | 0.78        | 0.84        | 0.77        |
| <i>MI</i>       | 237          | 845991        | 0.86        | 0.92        | 0.87        | 0.93        |
| <i>MN</i>       | 40           | 94452         | 1.22        | 1.30        | 1.24        | 1.25        |
| <i>MO</i>       | 102          | 436761        | 0.72        | 0.78        | 0.73        | 0.77        |
| <i>MS</i>       | 54           | 130706        | 1.23        | 1.18        | 1.19        | 1.18        |
| <i>MT</i>       | 20           | 50812         | 1.09        | 1.12        | 1.13        | 1.10        |
| <i>NC</i>       | 240          | 724667        | 1.00        | 0.97        | 0.98        | 0.97        |
| <i>ND</i>       | 5            | 27106         | 0.54        | 0.60        | 0.57        | 0.54        |

| <b>Recipient State</b> | <b>Total Deaths</b> | <b>Survival Time</b> | <b>Model 1<br/>SMR</b> | <b>Model 2<br/>SMR</b> | <b>Model 3<br/>SMR</b> | <b>Model 4<br/>SMR</b> |
|------------------------|---------------------|----------------------|------------------------|------------------------|------------------------|------------------------|
| <i>NE</i>              | 24                  | 92006                | 0.81                   | 0.89                   | 0.83                   | 0.87                   |
| <i>NH</i>              | 27                  | 95233                | 0.85                   | 0.81                   | 0.86                   | 0.81                   |
| <i>NJ</i>              | 249                 | 669932               | 1.14                   | 1.07                   | 1.11                   | 1.09                   |
| <i>NM</i>              | 43                  | 153847               | 0.86                   | 0.88                   | 0.89                   | 0.89                   |
| <i>NV</i>              | 36                  | 119724               | 0.93                   | 0.97                   | 0.96                   | 0.95                   |
| <i>NY</i>              | 314                 | 1044297              | 0.93                   | 0.90                   | 0.92                   | 0.91                   |
| <i>OH</i>              | 333                 | 1057029              | 0.97                   | 1.02                   | 0.97                   | 1.03                   |
| <i>OK</i>              | 95                  | 260988               | 1.11                   | 1.09                   | 1.12                   | 1.08                   |
| <i>OR</i>              | 32                  | 173411               | 0.58                   | 0.62                   | 0.60                   | 0.60                   |
| <i>PA</i>              | 522                 | 1482880              | 1.08                   | 1.05                   | 1.08                   | 1.06                   |
| <i>RI</i>              | 15                  | 41745                | 1.07                   | 1.07                   | 1.07                   | 1.05                   |
| <i>SC</i>              | 89                  | 221355               | 1.20                   | 1.15                   | 1.18                   | 1.14                   |
| <i>SD</i>              | 11                  | 20286                | 1.50                   | 1.68                   | 1.59                   | 1.69                   |
| <i>TN</i>              | 105                 | 337134               | 0.95                   | 0.94                   | 0.95                   | 0.92                   |
| <i>TX</i>              | 717                 | 2146904              | 1.00                   | 0.97                   | 1.00                   | 0.97                   |
| <i>UT</i>              | 18                  | 59382                | 0.93                   | 1.00                   | 0.99                   | 0.96                   |
| <i>VA</i>              | 161                 | 501904               | 0.97                   | 0.94                   | 0.95                   | 0.95                   |
| <i>VT</i>              | 12                  | 24662                | 1.46                   | 1.48                   | 1.47                   | 1.44                   |
| <i>WA</i>              | 82                  | 294895               | 0.84                   | 0.86                   | 0.85                   | 0.85                   |
| <i>WI</i>              | 69                  | 243109               | 0.88                   | 0.97                   | 0.91                   | 0.95                   |
| <i>WV</i>              | 64                  | 201951               | 0.98                   | 0.95                   | 0.97                   | 0.95                   |
| <i>WY</i>              | 9                   | 25240                | 1.02                   | 1.04                   | 1.05                   | 1.00                   |



**eTable 5. Donor and Recipient Characteristics by US Census Region**

ADI quintiles (1 = highest ADI, 5 = lowest ADI), Diagnosis groups (group A, obstructive lung disease; group B, pulmonary vascular disease; group C, cystic fibrosis and immunodeficiency disorders; and group D, restrictive lung diseases).

| <b>Characteristic</b>                   | <b>Midwest<br/>N = 4,262<sup>1</sup></b> | <b>Northeast<br/>N = 3,973<sup>1</sup></b> | <b>South<br/>N = 7,430<sup>1</sup></b> | <b>West<br/>N = 3,839<sup>1</sup></b> |
|-----------------------------------------|------------------------------------------|--------------------------------------------|----------------------------------------|---------------------------------------|
| <i>Candidate Age at Listing</i>         | 60 (52, 65)                              | 61 (52, 66)                                | 60 (50, 66)                            | 60 (51, 66)                           |
| <i>Race and Ethnicity</i>               |                                          |                                            |                                        |                                       |
| <i>Non-Hispanic White</i>               | 3,666 (86%)                              | 3,177 (80%)                                | 5,744 (77%)                            | 2,788 (73%)                           |
| <i>Non-Hispanic Black</i>               | 373 (8.8%)                               | 374 (9.4%)                                 | 934 (13%)                              | 180 (4.7%)                            |
| <i>Hispanic</i>                         | 137 (3.2%)                               | 295 (7.4%)                                 | 628 (8.5%)                             | 656 (17%)                             |
| <i>Asian or Pacific Islander</i>        | 66 (1.5%)                                | 112 (2.8%)                                 | 98 (1.3%)                              | 166 (4.3%)                            |
| <i>American Indian or Alaska Native</i> | 14 (0.3%)                                | 6 (0.2%)                                   | 12 (0.2%)                              | 31 (0.8%)                             |
| <i>Multiracial</i>                      | 6 (0.1%)                                 | 9 (0.2%)                                   | 14 (0.2%)                              | 18 (0.5%)                             |
| <i>Recipient ADI Quintile</i>           |                                          |                                            |                                        |                                       |
| 1                                       | 1,006 (24%)                              | 1,736 (44%)                                | 1,789 (24%)                            | 1,591 (41%)                           |
| 2                                       | 940 (22%)                                | 788 (20%)                                  | 1,338 (18%)                            | 676 (18%)                             |
| 3                                       | 991 (23%)                                | 612 (15%)                                  | 1,417 (19%)                            | 568 (15%)                             |
| 4                                       | 772 (18%)                                | 415 (10%)                                  | 1,508 (20%)                            | 556 (14%)                             |
| 5                                       | 553 (13%)                                | 422 (11%)                                  | 1,378 (19%)                            | 448 (12%)                             |
| <i>Diagnosis</i>                        |                                          |                                            |                                        |                                       |
| A                                       | 1,237 (29%)                              | 951 (24%)                                  | 1,798 (24%)                            | 897 (23%)                             |
| B                                       | 185 (4.3%)                               | 219 (5.5%)                                 | 267 (3.6%)                             | 191 (5.0%)                            |
| C                                       | 409 (9.6%)                               | 362 (9.1%)                                 | 728 (9.8%)                             | 309 (8.0%)                            |
| D                                       | 2,431 (57%)                              | 2,441 (61%)                                | 4,637 (62%)                            | 2,442 (64%)                           |
| <i>Blood Type</i>                       |                                          |                                            |                                        |                                       |
| A                                       | 1,734 (41%)                              | 1,574 (40%)                                | 2,891 (39%)                            | 1,457 (38%)                           |
| AB                                      | 174 (4.1%)                               | 167 (4.2%)                                 | 282 (3.8%)                             | 152 (4.0%)                            |
| B                                       | 468 (11%)                                | 505 (13%)                                  | 831 (11%)                              | 385 (10%)                             |
| O                                       | 1,886 (44%)                              | 1,727 (43%)                                | 3,426 (46%)                            | 1,845 (48%)                           |
| <i>BMI</i>                              | 26.1 (22.0, 29.1)                        | 26.3 (22.3, 29.8)                          | 25.9 (22.2, 29.1)                      | 25.7 (21.9, 29.0)                     |
| <i>Unknown</i>                          | 2                                        | 3                                          | 2                                      | 2                                     |
| <i>Functional Status</i>                |                                          |                                            |                                        |                                       |
| 1                                       | 189 (4.4%)                               | 389 (9.8%)                                 | 430 (5.8%)                             | 622 (16%)                             |
| 2                                       | 3,713 (87%)                              | 3,305 (84%)                                | 6,378 (86%)                            | 2,927 (76%)                           |

| <b>Characteristic</b>                     | <b>Midwest<br/>N = 4,262<sup>1</sup></b> | <b>Northeast<br/>N = 3,973<sup>1</sup></b> | <b>South<br/>N = 7,430<sup>1</sup></b> | <b>West<br/>N = 3,839<sup>1</sup></b> |
|-------------------------------------------|------------------------------------------|--------------------------------------------|----------------------------------------|---------------------------------------|
| 3                                         | 350 (8.2%)                               | 263 (6.6%)                                 | 592 (8.0%)                             | 286 (7.5%)                            |
| <i>Unknown</i>                            | 10                                       | 16                                         | 30                                     | 4                                     |
| <i>Six-min walk distance</i>              | 880 (575, 1,128)                         | 800 (518, 1,082)                           | 850 (530, 1,108)                       | 780 (393, 1,094)                      |
| <i>Unknown</i>                            | 78                                       | 63                                         | 106                                    | 114                                   |
| <i>Cardiac Index</i>                      | 2.71 (2.35, 3.20)                        | 2.79 (2.40, 3.26)                          | 2.80 (2.42, 3.29)                      | 2.84 (2.44, 3.35)                     |
| <i>Unknown</i>                            | 1,074                                    | 1,194                                      | 1,699                                  | 1,094                                 |
| <i>Bilirubin</i>                          | 0.40 (0.30, 0.60)                        | 0.40 (0.30, 0.60)                          | 0.50 (0.30, 0.70)                      | 0.50 (0.30, 0.70)                     |
| <i>Unknown</i>                            | 1,264                                    | 1,085                                      | 2,452                                  | 1,178                                 |
| <i>Creatinine</i>                         | 0.81 (0.66, 0.97)                        | 0.81 (0.69, 0.98)                          | 0.80 (0.70, 1.00)                      | 0.80 (0.67, 0.94)                     |
| <i>Unknown</i>                            | 22                                       | 26                                         | 19                                     | 18                                    |
| <i>Supplemental Oxygen (L)</i>            | 4.0 (2.0, 6.0)                           | 4.0 (3.0, 6.0)                             | 4.0 (3.0, 6.0)                         | 4.0 (3.0, 6.0)                        |
| <i>Unknown</i>                            | 584                                      | 517                                        | 1,048                                  | 517                                   |
| <i>Respiratory Support</i>                |                                          |                                            |                                        |                                       |
| <i>BiPap</i>                              | 344 (8.1%)                               | 289 (7.3%)                                 | 513 (6.9%)                             | 250 (6.5%)                            |
| <i>Mechanical</i>                         | 229 (5.4%)                               | 191 (4.8%)                                 | 428 (5.8%)                             | 252 (6.6%)                            |
| <i>None</i>                               | 3,428 (81%)                              | 3,238 (82%)                                | 6,071 (82%)                            | 3,133 (82%)                           |
| <i>CPAP</i>                               | 257 (6.0%)                               | 243 (6.1%)                                 | 404 (5.4%)                             | 201 (5.2%)                            |
| <i>Unknown</i>                            | 4                                        | 12                                         | 14                                     | 3                                     |
| <i>PCO2</i>                               | 46 (40, 54)                              | 44 (39, 53)                                | 44 (39, 51)                            | 44 (39, 51)                           |
| <i>Unknown</i>                            | 174                                      | 236                                        | 347                                    | 92                                    |
| <i>Supplemental O2 Percent</i>            | 81 (55, 100)                             | 100 (60, 100)                              | 88 (53, 100)                           | 80 (50, 100)                          |
| <i>Unknown</i>                            | 3,768                                    | 3,573                                      | 6,585                                  | 3,431                                 |
| <i>Pulmonary Artery Systolic Pressure</i> | 40 (33, 50)                              | 39 (32, 50)                                | 38 (32, 48)                            | 38 (31, 48)                           |
| <i>Unknown</i>                            | 915                                      | 1,142                                      | 1,397                                  | 882                                   |
| <i>Donor Age</i>                          | 33 (23, 47)                              | 34 (24, 47)                                | 32 (23, 45)                            | 34 (23, 47)                           |
| <i>Donor Race</i>                         |                                          |                                            |                                        |                                       |
| <i>Non-Hispanic White</i>                 | 2,969 (70%)                              | 2,655 (67%)                                | 4,375 (59%)                            | 1,936 (50%)                           |
| <i>Non-Hispanic Black</i>                 | 823 (19%)                                | 738 (19%)                                  | 1,762 (24%)                            | 344 (9.0%)                            |
| <i>Hispanic</i>                           | 346 (8.1%)                               | 449 (11%)                                  | 1,084 (15%)                            | 1,238 (32%)                           |
| <i>Asian or Pacific Islander</i>          | 100 (2.3%)                               | 109 (2.7%)                                 | 172 (2.3%)                             | 254 (6.6%)                            |
| <i>American Indian or Alaska Native</i>   | 19 (0.4%)                                | 9 (0.2%)                                   | 28 (0.4%)                              | 43 (1.1%)                             |
| <i>Multiracial</i>                        | 5 (0.1%)                                 | 13 (0.3%)                                  | 9 (0.1%)                               | 24 (0.6%)                             |

| <b>Characteristic</b>     | <b>Midwest<br/>N = 4,262<sup>1</sup></b> | <b>Northeast<br/>N = 3,973<sup>1</sup></b> | <b>South<br/>N = 7,430<sup>1</sup></b> | <b>West<br/>N = 3,839<sup>1</sup></b> |
|---------------------------|------------------------------------------|--------------------------------------------|----------------------------------------|---------------------------------------|
| <i>Donor ADI Quintile</i> |                                          |                                            |                                        |                                       |
| 1                         | 800 (19%)                                | 1,049 (26%)                                | 1,269 (17%)                            | 1,060 (28%)                           |
| 2                         | 733 (17%)                                | 698 (18%)                                  | 1,186 (16%)                            | 638 (17%)                             |
| 3                         | 893 (21%)                                | 709 (18%)                                  | 1,334 (18%)                            | 570 (15%)                             |
| 4                         | 852 (20%)                                | 715 (18%)                                  | 1,633 (22%)                            | 668 (17%)                             |
| 5                         | 984 (23%)                                | 802 (20%)                                  | 2,008 (27%)                            | 903 (24%)                             |
| <i>Donor Region</i>       |                                          |                                            |                                        |                                       |
| Midwest                   | 2,959 (69%)                              | 747 (19%)                                  | 905 (12%)                              | 142 (3.7%)                            |
| Northeast                 | 160 (3.8%)                               | 1,947 (49%)                                | 381 (5.1%)                             | 18 (0.5%)                             |
| South                     | 986 (23%)                                | 1,202 (30%)                                | 5,918 (80%)                            | 270 (7.0%)                            |
| West                      | 157 (3.7%)                               | 77 (1.9%)                                  | 226 (3.0%)                             | 3,409 (89%)                           |

<sup>1</sup>Median (IQR); n (%)

## eReferences

1. Valeri L, VanderWeele TJ. Mediation analysis allowing for exposure–mediator interactions and causal interpretation: theoretical assumptions and implementation with SAS and SPSS macros. *Psychological methods*. 2013 Jun;18(2):137.
