# Supplementary material for: Association of Socioeconomic Position With Racial and Ethnic Disparities in Survival After Lung Transplant
Source: PubMed Central journal article supplement (PMC10116361; doi:10.1001/jamanetworkopen.2023.8306), 2023-04-19
Supplement: jamanetwopen-e238306-s002.pdf [file jamanetwopen-e238306-s002.pdf]

## Data Sharing Statement

Lehr. Association of Socioeconomic Position With Racial and Ethnic Disparities in Survival After Lung Transplant. *JAMA Netw Open*. Published April 19, 2023.  
doi:10.1001/jamanetworkopen.2023.8306

### Data

**Data available:** No

### Additional Information

**Explanation for why data not available:** Data is publicly available through the Scientific Registry of Transplant Recipients.
